# Supplementary material for: Multiobjective Optimization Approach for Coordinating Different DG from Distribution Network Operator
Source: Hindawi journal article supplement (doi:10.1155/2018/4790942), 2018-11-15
Supplement: f1 [file 4790942.f1.pdf]

This file includes some data, which include parameters for IEEE 37-bus system and some descriptions for wind speed and photovoltaic generation, to support the findings of the manuscript 4790942. The details are as following:

(1) Parameters for IEEE 37-bus system are listed in table1

Table 1 system and load data for IEEE 37-bus system

| Branch | Primary<br>node | Secondary<br>node | Resistance<br>(p.u.) | Reactance<br>(p.u.) | Branch Capacity<br>(MVA) | Active<br>power<br>(p.u.) | Reactive<br>Power<br>(p.u.) |
|--------|-----------------|-------------------|----------------------|---------------------|--------------------------|---------------------------|-----------------------------|
| 1      | 0               | 1                 | 0.000574             | 0.000293            | 4.6                      | 0.1                       | 0.06                        |
| 2      | 1               | 2                 | 0.00307              | 0.001564            | 4.1                      | 0.09                      | 0.04                        |
| 3      | 2               | 3                 | 0.002279             | 0.001161            | 2.9                      | 0.12                      | 0.08                        |
| 4      | 3               | 4                 | 0.002373             | 0.001209            | 2.9                      | 0.06                      | 0.03                        |
| 5      | 4               | 5                 | 0.0051               | 0.004402            | 2.9                      | 0.06                      | 0.02                        |
| 6      | 5               | 6                 | 0.001166             | 0.003853            | 1.5                      | 0.2                       | 0.1                         |
| 7      | 6               | 7                 | 0.00443              | 0.001464            | 1.05                     | 0.2                       | 0.1                         |
| 8      | 7               | 8                 | 0.006413             | 0.004608            | 1.05                     | 0.06                      | 0.02                        |
| 9      | 8               | 9                 | 0.006501             | 0.004608            | 1.05                     | 0.06                      | 0.02                        |
| 10     | 9               | 10                | 0.001224             | 0.000405            | 1.05                     | 0.045                     | 0.03                        |
| 11     | 10              | 11                | 0.002331             | 0.000771            | 1.05                     | 0.06                      | 0.035                       |
| 12     | 11              | 12                | 0.009141             | 0.007192            | 0.5                      | 0.06                      | 0.035                       |
| 13     | 12              | 13                | 0.003372             | 0.004439            | 0.45                     | 0.12                      | 0.08                        |
| 14     | 13              | 14                | 0.00368              | 0.003275            | 0.3                      | 0.06                      | 0.01                        |
| 15     | 14              | 15                | 0.004647             | 0.003394            | 0.25                     | 0.06                      | 0.02                        |
| 16     | 15              | 16                | 0.008026             | 0.010716            | 0.25                     | 0.06                      | 0.02                        |
| 17     | 16              | 17                | 0.004558             | 0.003574            | 0.1                      | 0.09                      | 0.04                        |
| 18     | 17              | 18                | 0.003113             | 0.003113            | 0.5                      | 0                         | 0                           |
| 19     | 11              | 19                | 0.012453             | 0.012453            | 0.5                      | 0                         | 0                           |
| 20     | 8               | 20                | 0.012453             | 0.012453            | 0.5                      | 0                         | 0                           |
| 21     | 7               | 21                | 0.012453             | 0.012453            | 0.5                      | 0                         | 0                           |
| 22     | 5               | 22                | 0.001264             | 0.000644            | 1.5                      | 0.06                      | 0.025                       |
| 23     | 22              | 23                | 0.00177              | 0.000901            | 1.5                      | 0.06                      | 0.025                       |
| 24     | 23              | 24                | 0.006594             | 0.005814            | 1.5                      | 0.06                      | 0.02                        |
| 25     | 24              | 25                | 0.005007             | 0.004362            | 1.5                      | 0.12                      | 0.07                        |
| 26     | 25              | 26                | 0.00316              | 0.00161             | 1.5                      | 0.2                       | 0.6                         |
| 27     | 26              | 27                | 0.006067             | 0.005996            | 0.5                      | 0.15                      | 0.07                        |
| 28     | 27              | 28                | 0.001933             | 0.002253            | 0.5                      | 0.21                      | 0.1                         |
| 29     | 28              | 29                | 0.002123             | 0.003301            | 0.1                      | 0.06                      | 0.04                        |
| 30     | 2               | 30                | 0.002809             | 0.00192             | 1.05                     | 0.09                      | 0.05                        |
| 31     | 30              | 31                | 0.005592             | 0.004415            | 1.05                     | 0.42                      | 0.2                         |
| 32     | 31              | 32                | 0.005579             | 0.004366            | 0.5                      | 0.42                      | 0.2                         |
| 33     | 32              | 33                | 0.003113             | 0.003113            | 0.1                      | 0                         | 0                           |
| 34     | 1               | 34                | 0.001021             | 0.000974            | 0.5                      | 0.09                      | 0.04                        |
| 35     | 34              | 35                | 0.009366             | 0.00844             | 0.5                      | 0.09                      | 0.04                        |
| 36     | 35              | 36                | 0.00255              | 0.002979            | 0.21                     | 0.09                      | 0.04                        |
| 37     | 36              | 37                | 0.004414             | 0.005836            | 0.11                     | 0.09                      | 0.04                        |

(2)Data for wind speed

8760 wind Data, which is shown in Fig.1, is used in this manuscript. As requested by the supplier, partial data are listed in table 2.

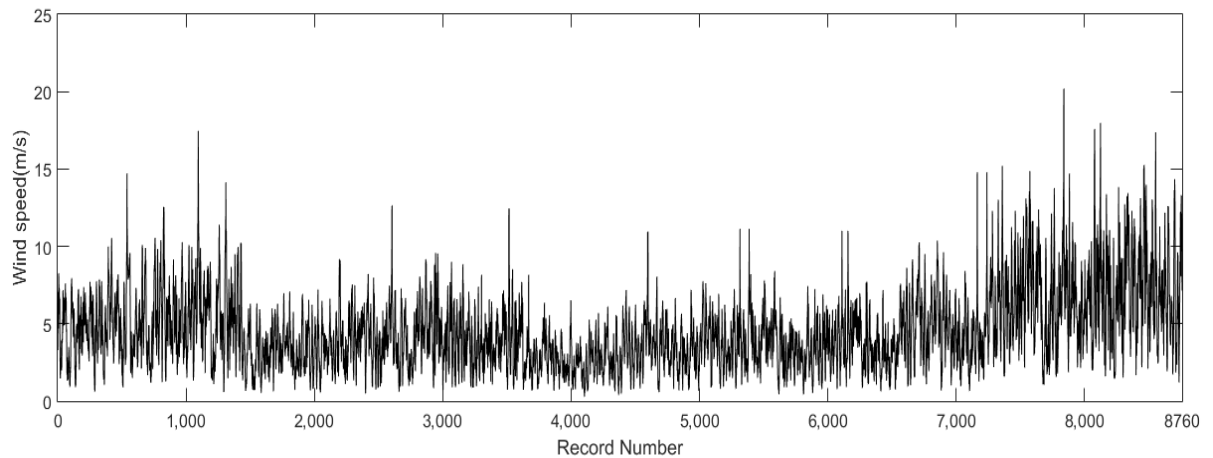

Figure 1 Wind Speed

Table 2 Some data corresponding to figure 1

| ID for device | ID for Wind | ID for Wind | Record Time   | Wind speed |
|---------------|-------------|-------------|---------------|------------|
| 104           | 4           | 1           | 2011-4-6 7:00 | 0          |
| 104           | 4           | 1           | 2011-4-6 7:00 | 11         |
| 104           | 4           | 1           | 2011-4-6 7:00 | 12         |
| 104           | 4           | 1           | 2011-4-6 7:00 | 10.6       |
| 104           | 4           | 1           | 2011-4-6 7:00 | 11         |
| 104           | 4           | 1           | 2011-4-6 7:00 | 12         |
| 104           | 4           | 1           | 2011-4-6 7:00 | 13.2       |
| 104           | 4           | 1           | 2011-4-6 7:00 | 13.3       |
| 104           | 4           | 1           | 2011-4-6 7:00 | 13.2       |
| 104           | 4           | 1           | 2011-4-6 7:00 | 12.4       |
| 104           | 4           | 1           | 2011-4-6 7:00 | 11.6       |
| 104           | 4           | 1           | 2011-4-6 7:00 | 12.8       |
| 104           | 4           | 1           | 2011-4-6 7:00 | 13.8       |
| 104           | 4           | 1           | 2011-4-6 7:00 | 12.7       |
| 104           | 4           | 1           | 2011-4-6 7:00 | 13.1       |
| 104           | 4           | 1           | 2011-4-6 7:00 | 12.4       |
| 104           | 4           | 1           | 2011-4-6 7:00 | 13.3       |
| 104           | 4           | 1           | 2011-4-6 7:00 | 11.8       |
| 104           | 4           | 1           | 2011-4-6 7:00 | 12.9       |
| 104           | 4           | 1           | 2011-4-6 7:00 | 11.5       |
| 104           | 4           | 1           | 2011-4-6 7:00 | 12.2       |
| 104           | 4           | 1           | 2011-4-6 7:00 | 12.8       |
| 104           | 4           | 1           | 2011-4-6 7:00 | 12.8       |
| 104           | 4           | 1           | 2011-4-6 7:00 | 12.8       |
| 104           | 4           | 1           | 2011-4-6 7:00 | 13         |
| 104           | 4           | 1           | 2011-4-6 7:00 | 12.2       |
| 104           | 4           | 1           | 2011-4-6 7:00 | 12.8       |
| 104           | 4           | 1           | 2011-4-6 7:00 | 14.2       |
| 104           | 4           | 1           | 2011-4-6 7:00 | 13.6       |
| 104           | 4           | 1           | 2011-4-6 7:00 | 12.7       |
| 104           | 4           | 1           | 2011-4-6 7:00 | 13.7       |
| 104           | 4           | 1           | 2011-4-6 7:00 | 12.9       |
| 104           | 4           | 1           | 2011-4-6 7:00 | 13.2       |
| 104           | 4           | 1           | 2011-4-6 7:00 | 13.4       |
| 104           | 4           | 1           | 2011-4-6 7:00 | 13.7       |
| 104           | 4           | 1           | 2011-4-6 7:00 | 12.5       |
| 104           | 4           | 1           | 2011-4-6 7:00 | 13.3       |
| 104           | 4           | 1           | 2011-4-6 7:00 | 14         |
| 104           | 4           | 1           | 2011-4-6 7:00 | 13.9       |

|     |   |   |               |      |
|-----|---|---|---------------|------|
| 104 | 4 | 1 | 2011-4-6 7:00 | 13.8 |
| 104 | 4 | 1 | 2011-4-6 7:00 | 12.8 |
| 104 | 4 | 1 | 2011-4-6 7:00 | 12.4 |
| 104 | 4 | 1 | 2011-4-6 7:00 | 11.7 |
| 104 | 4 | 1 | 2011-4-6 7:00 | 13.2 |
| 104 | 4 | 1 | 2011-4-6 7:00 | 12.6 |
| 104 | 4 | 1 | 2011-4-6 7:00 | 12   |
| 104 | 4 | 1 | 2011-4-6 7:00 | 13.6 |
| 104 | 4 | 1 | 2011-4-6 7:00 | 13.7 |
| 104 | 4 | 1 | 2011-4-6 7:00 | 14.3 |
| 104 | 4 | 1 | 2011-4-6 7:00 | 13.6 |
| 104 | 4 | 1 | 2011-4-6 7:00 | 12.7 |
| 104 | 4 | 1 | 2011-4-6 7:00 | 12   |
| 104 | 4 | 1 | 2011-4-6 7:00 | 12.7 |
| 104 | 4 | 1 | 2011-4-6 7:00 | 11.8 |
| 104 | 4 | 1 | 2011-4-6 7:00 | 10.7 |
| 104 | 4 | 1 | 2011-4-6 7:00 | 11.4 |
| 104 | 4 | 1 | 2011-4-6 7:00 | 10.9 |
| 104 | 4 | 1 | 2011-4-6 7:00 | 13.9 |
| 104 | 4 | 1 | 2011-4-6 7:00 | 14.1 |

## (2)Data for photovoltaic generation

Data for photovoltaic generation is 70080, which are shown in figure 2. For the sake of security and the requirements of supplier, some data are listed in table 3.

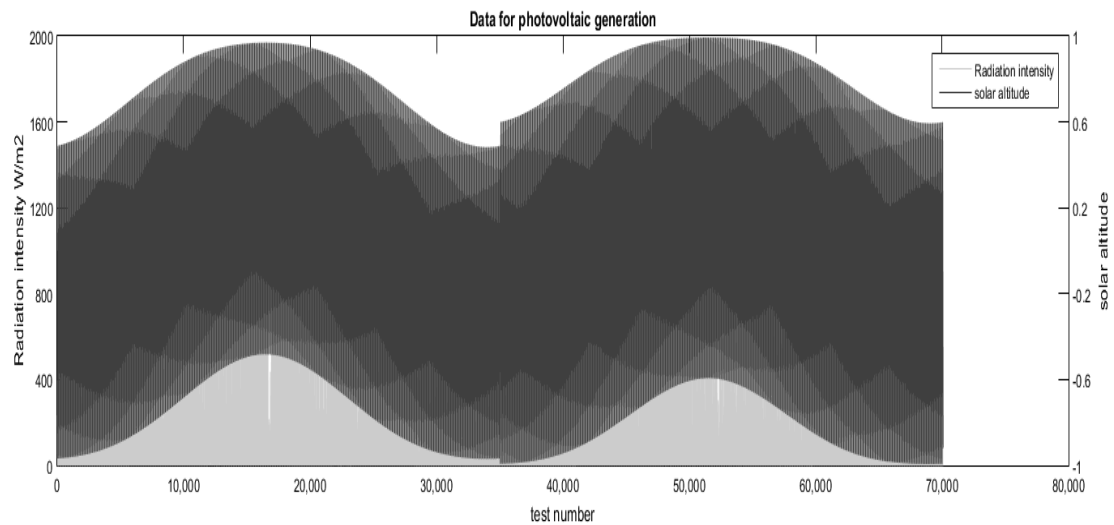

Figure 2 Data for photovoltaic generation

Table 3 Some data corresponding to figure 2

| Record Time   | Radiation intensity | Solar altitude |
|---------------|---------------------|----------------|
| 2015-1-1 0:00 | 0                   | -0.76712       |
| 2015-1-1 0:15 | 0                   | -0.78799       |
| 2015-1-1 0:30 | 0                   | -0.82671       |
| 2015-1-1 0:45 | 0                   | -0.8445        |
| 2015-1-1 1:00 | 0                   | -0.87675       |
| 2015-1-1 1:15 | 0                   | -0.89116       |
| 2015-1-1 1:30 | 0                   | -0.91643       |
| 2015-1-1 1:45 | 0                   | -0.9368        |
| 2015-1-1 2:00 | 0                   | -0.9451        |
| 2015-1-1 2:15 | 0                   | -0.95785       |
| 2015-1-1 2:30 | 0                   | -0.96229       |

---

|                |          |          |
|----------------|----------|----------|
| 2015-1-1 2:45  | 0        | -0.96723 |
| 2015-1-1 3:00  | 0        | -0.96773 |
| 2015-1-1 3:15  | 0        | -0.96477 |
| 2015-1-1 3:30  | 0        | -0.96132 |
| 2015-1-1 3:45  | 0        | -0.95052 |
| 2015-1-1 4:00  | 0        | -0.94318 |
| 2015-1-1 4:15  | 0        | -0.9247  |
| 2015-1-1 4:30  | 0        | -0.91359 |
| 2015-1-1 4:45  | 0        | -0.88773 |
| 2015-1-1 5:00  | 0        | -0.85718 |
| 2015-1-1 5:15  | 0        | -0.84022 |
| 2015-1-1 5:30  | 0        | -0.80306 |
| 2015-1-1 5:45  | 0        | -0.78293 |
| 2015-1-1 6:00  | 0        | -0.73977 |
| 2015-1-1 6:15  | 0        | -0.71681 |
| 2015-1-1 6:30  | 0        | -0.66833 |
| 2015-1-1 6:45  | 0        | -0.64291 |
| 2015-1-1 7:00  | 0        | -0.58992 |
| 2015-1-1 7:15  | 0        | -0.56245 |
| 2015-1-1 7:30  | 0        | -0.5058  |
| 2015-1-1 7:45  | 0        | -0.47672 |
| 2015-1-1 8:00  | 0        | 0        |
| 2015-1-1 8:15  | 0        | -0.37076 |
| 2015-1-1 8:30  | 0        | -0.30939 |
| 2015-1-1 8:45  | 0        | -0.27848 |
| 2015-1-1 9:00  | 0        | -0.21651 |
| 2015-1-1 9:15  | 0        | -0.18556 |
| 2015-1-1 9:30  | 0        | -0.124   |
| 2015-1-1 9:45  | 0        | -0.09351 |
| 2015-1-1 10:00 | 0        | -0.03336 |
| 2015-1-1 10:15 | 0        | -0.00382 |
| 2015-1-1 10:30 | 17.54213 | 0.053945 |
| 2015-1-1 10:45 | 43.03933 | 0.082057 |
| 2015-1-1 11:00 | 103.2481 | 0.13649  |
| 2015-1-1 11:15 | 134.7203 | 0.162714 |
| 2015-1-1 11:30 | 197.3536 | 0.212936 |
| 2015-1-1 11:45 | 257.4411 | 0.259892 |
| 2015-1-1 12:00 | 286.1375 | 0.282038 |
| 2015-1-1 12:15 | 340.3367 | 0.323466 |
| 2015-1-1 12:30 | 365.551  | 0.342674 |
| 2015-1-1 12:45 | 411.8388 | 0.377901 |
| 2015-1-1 13:00 | 432.4491 | 0.393858 |
| 2015-1-1 13:15 | 469.2916 | 0.422312 |
| 2015-1-1 13:30 | 485.5962 | 0.434758 |
| 2015-1-1 13:45 | 513.4106 | 0.455976 |
| 2015-1-1 14:00 | 524.9474 | 0.464709 |
| 2015-1-1 14:15 | 542.8517 | 0.478346 |
| 2015-1-1 14:30 | 549.1827 | 0.483224 |
| 2015-1-1 14:45 | 556.6115 | 0.489058 |
| 2015-1-1 15:00 | 556.9868 | 0.489629 |
| 2015-1-1 15:15 | 554.6097 | 0.487939 |
| 2015-1-1 15:30 | 544.2856 | 0.480621 |
| 2015-1-1 15:45 | 536.3615 | 0.475006 |

---
